# Supplementary material
Source: Research Square preprint supplement (doi:10.21203/rs.3.rs-9988536/v1)
Supplement: Supplementary file 1 [file 25dfba15528bc893dec2861b.pdf]

### Sensitivity Analysis

By adjusting the temperature nodes to four levels (P10, P50, P75, P90) and re-running the model, the cumulative risks of temperature's impact on YLLs for NDDs remained consistent with those observed in the three-node scenario.

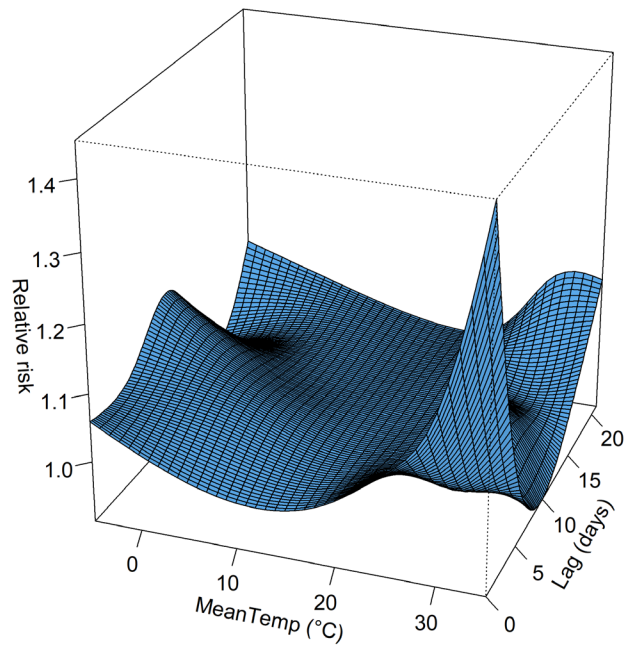

**Supplementary\_Figure\_S1. Relative risk of NDDs YLL with temperature in lags.**

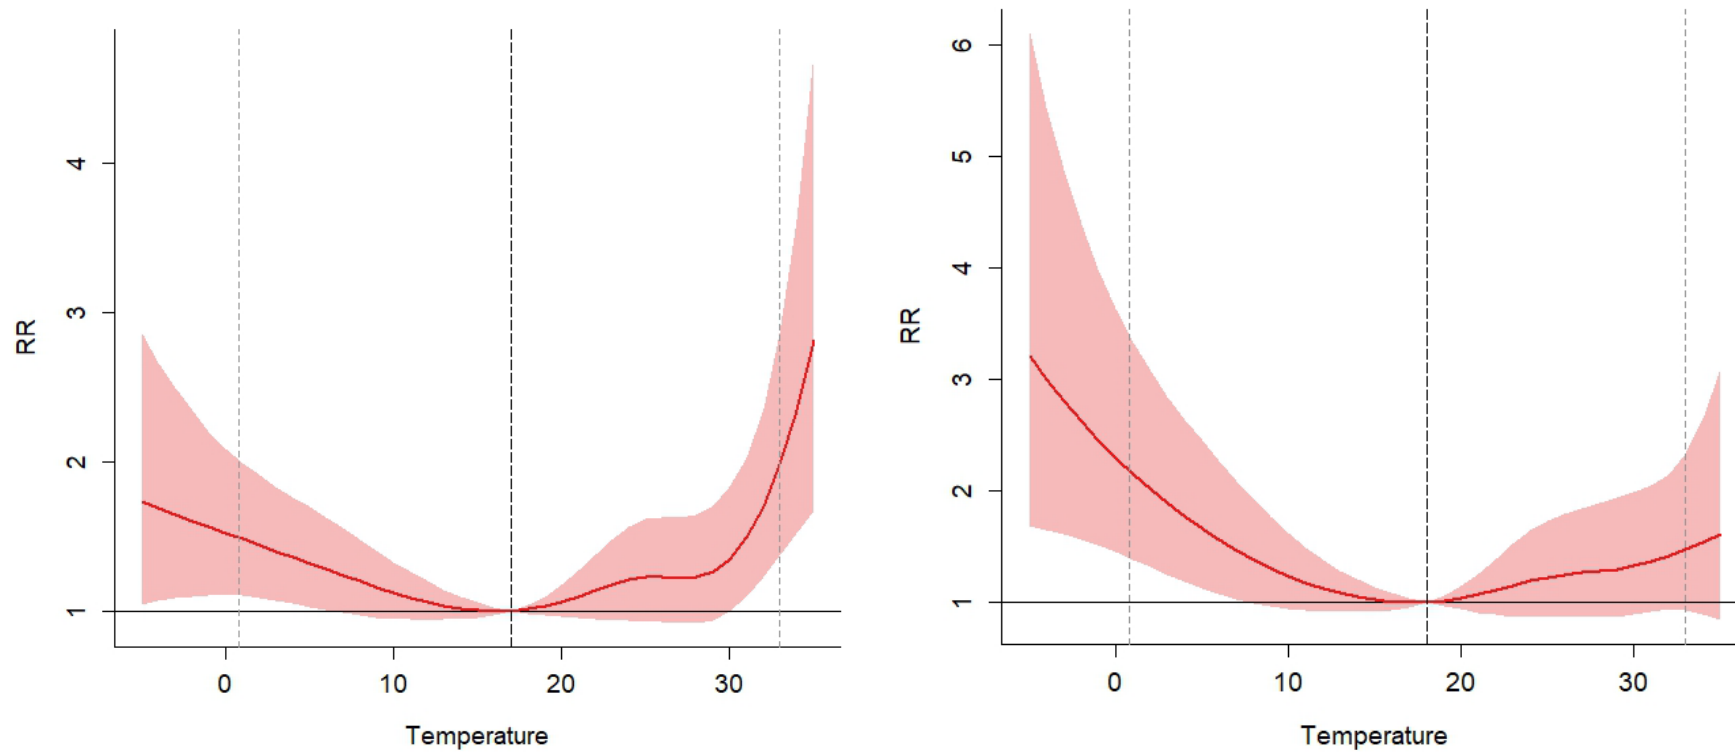

Supplementary\_Figure\_S2. Cumulative effects of temperature at lag 0-7 and lag 0-14 on NDDs YLL.

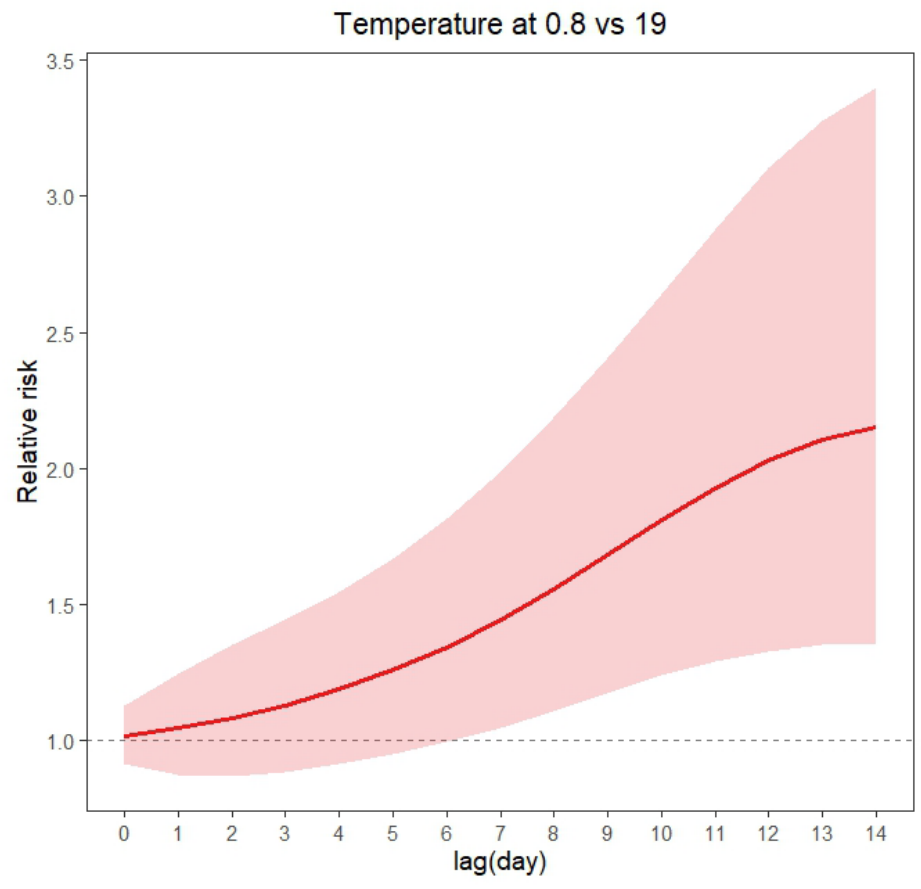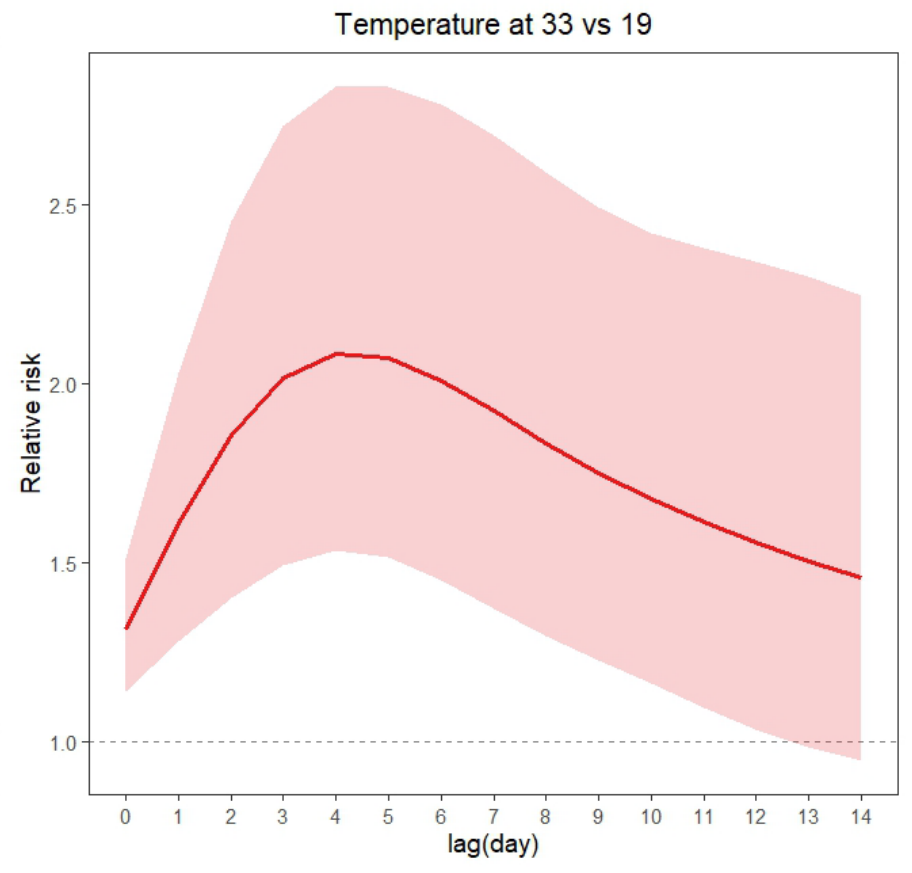

**Supplementary\_Figure\_S3. Cumulative effects of extremely temperature over 14 days at various lag structures.**
